# Supplementary material for: Aluminium in the North Atlantic Ocean and the Labrador Sea (GEOTRACES GA01 section): roles of continental inputs and biogenic particle removal
Source: Copernicus journal article supplement (doi:10.5194/bg-2018-39), 2018-01-23
Supplement: Supplementary file 1 [file bg-2018-39-supplement.pdf]

## Supplementary information

**Table 1 S:** Concentrations of total dissolvable Al (TdAl) in iceberg (ice) and fjord samples in Godthåbsfjord (SW Greenland). Iceberg samples are in the nM range and fjord samples are in the  $\mu\text{M}$  range. Ice samples were collected at  $66.7^\circ\text{ N } 50.7^\circ\text{ W}$  while fjord samples were collected at  $64.7^\circ\text{ N } 50.6^\circ\text{ W}$  in May 2014.

| Samples | [TdAl] |
|---------|--------|
| Ice 1   | 65.91  |
| Ice 2   | 35.65  |
| Ice 3   | 29.92  |
| Ice 4   | 29.31  |
| Ice 5   | 59.31  |
| Ice 6   | 62.89  |
| Ice 7   | 52.48  |
| Ice 8   | 112.85 |
| Ice 9   | 52.50  |
| Ice 10  | 45.56  |
| Ice 11  | 60.59  |
| Fjord 1 | 4.09   |
| Fjord 2 | 7.46   |
| Fjord 3 | 17.73  |
| Fjord 4 | 20.10  |
| Fjord 5 | 14.65  |
| Fjord 6 | 13.16  |

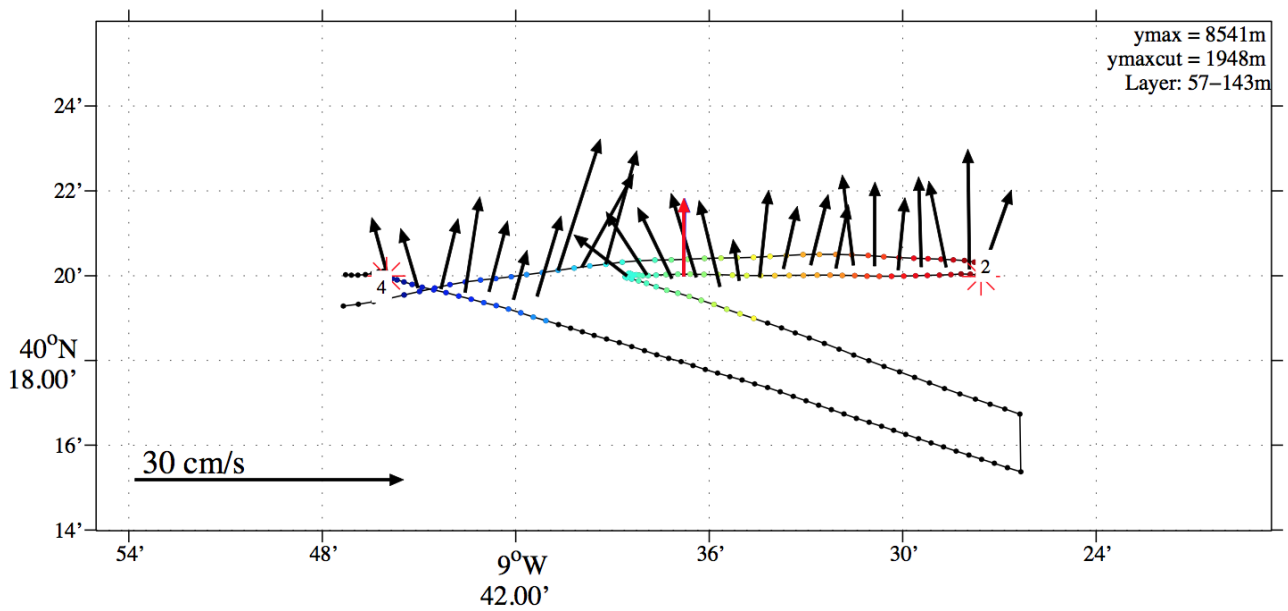

Figure 1: Ship ADCP data (OS 150kHz) between stations 2 and 4 during the GEOVIDE transect. Points give the position of individual velocity profiles. The segment between stations 2 and 4 were divided into 1-km elements where velocity data were averaged between 57m and 143m depth (black arrows). Individual profiles (points) are color-coded according to the 1-km element they belong to. Black points were excluded from the average because they are too far away from the [2 4] segment. The 1-km mean velocities were then averaged (red arrow). The ADCP data showed a northward direction of the surface currents.

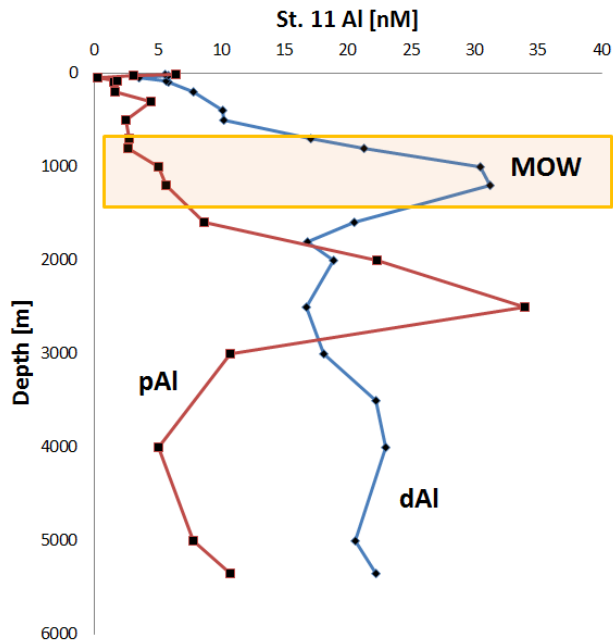

**Figure 2: Profiles of dissolved and particulate Al [nM] (Gourain et al., this issue) at station 11. The orange box represents the approximate depth of the Mediterranean Overflow Water (MOW). The high particulate Al observed at ca. 2500 m depth is associated with inputs from the Iberian margin.**
